# Supplementary material for: miR-125a-5p regulates the sialyltransferase ST3GAL1 in murine model of human intestinal campylobacteriosis
Source: Springer Nature journal article supplement (doi:10.1186/s13099-023-00577-6), 2023-10-17

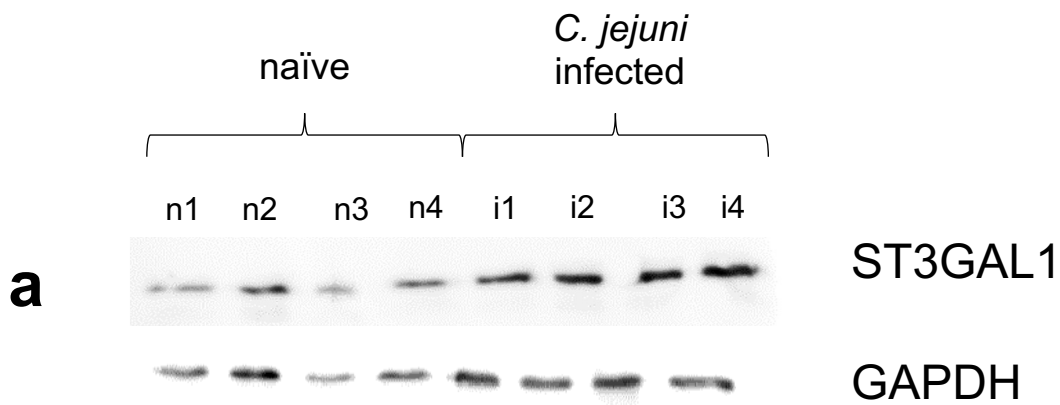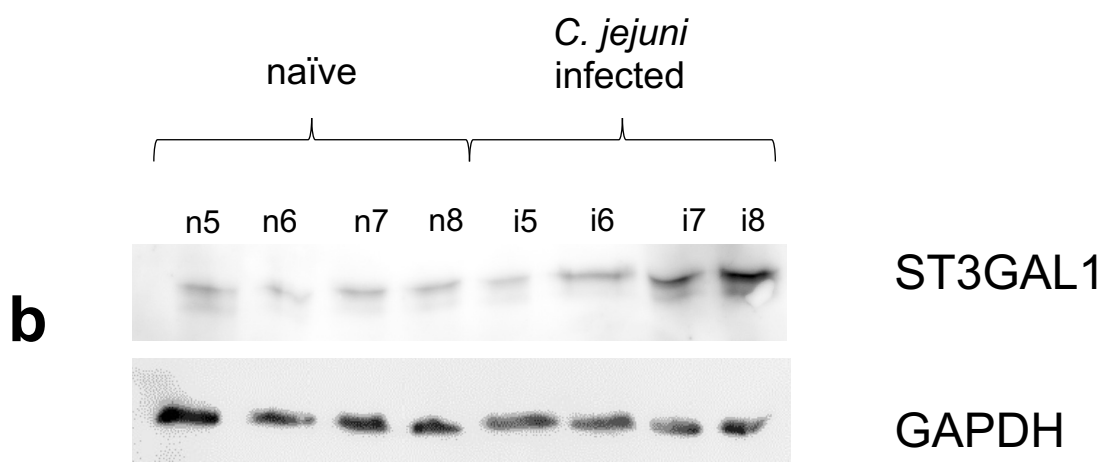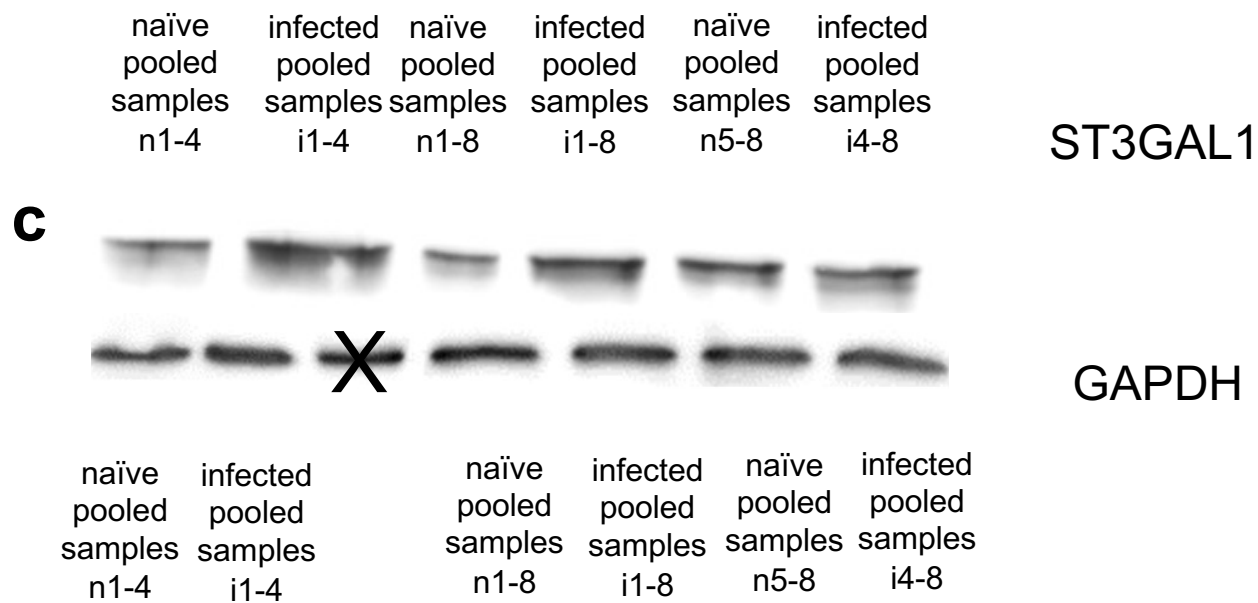

Supplement: MOESM3 [file 26191452]
