# Supplementary material for: miR-125a-5p regulates the sialyltransferase ST3GAL1 in murine model of human intestinal campylobacteriosis
Source: Springer Nature journal article supplement (doi:10.1186/s13099-023-00577-6), 2023-10-17

naïve IL10<sup>-/-</sup>  
mouse colon section

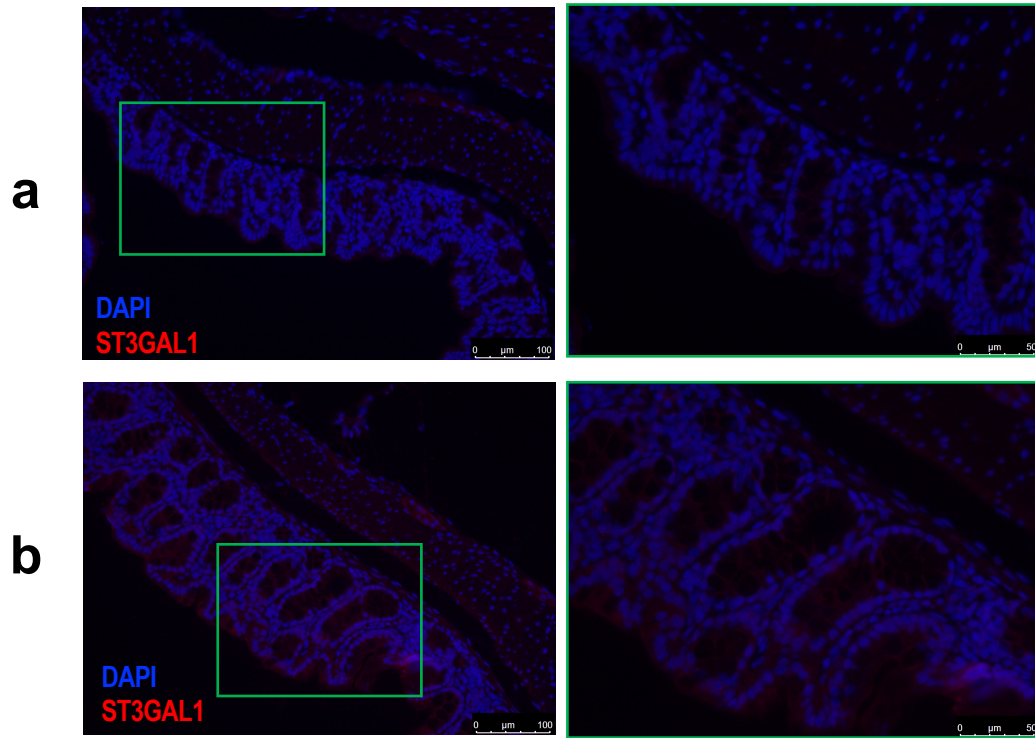

*C. jejuni* infected IL10<sup>-/-</sup>  
mouse colon section

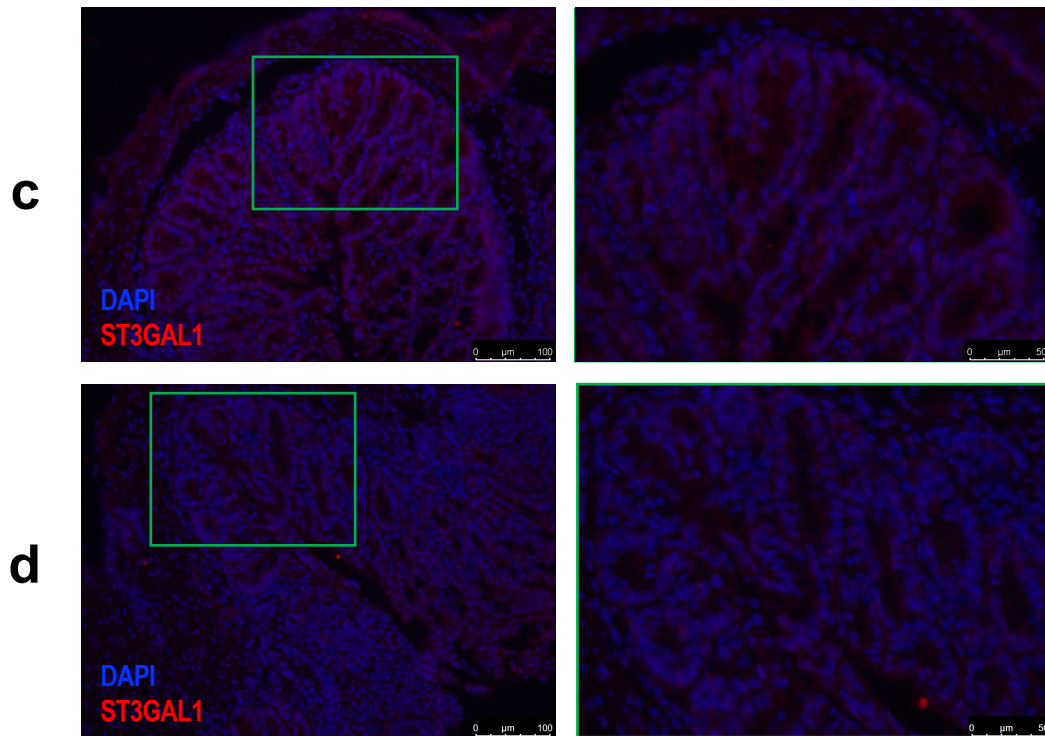

## negative controls

e

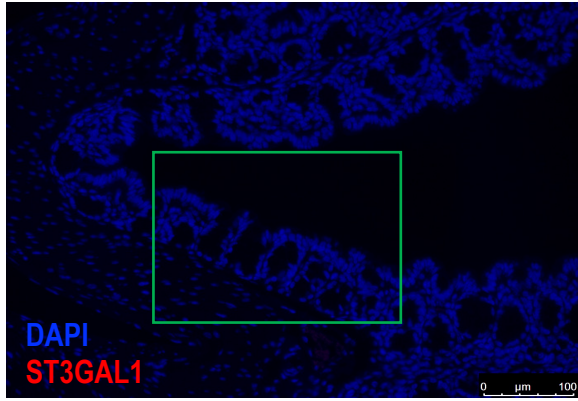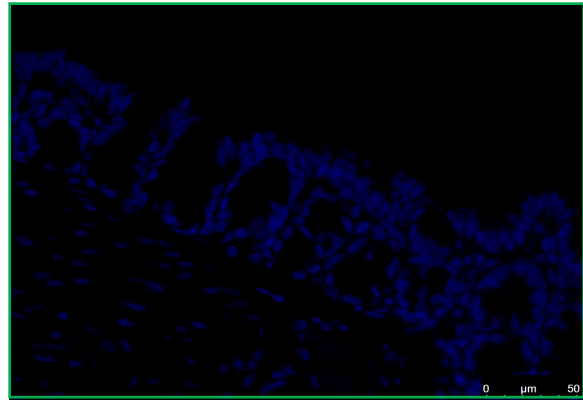

f

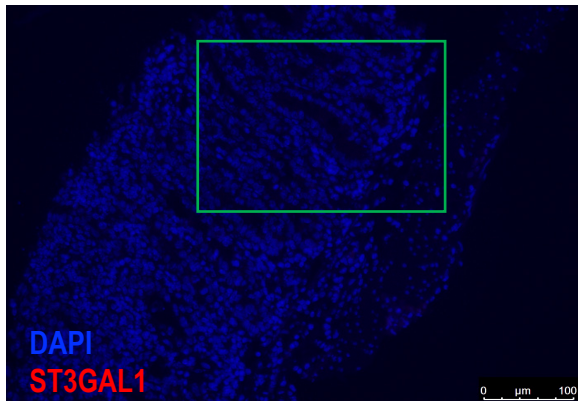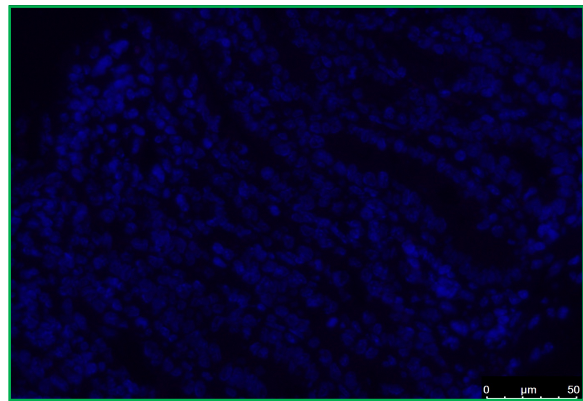

Supplement: MOESM5 [file 26191452]
